# Supplementary material
Source: PubMed Central journal article supplement (PMC4348786)
Supplement: supp_pp.114.255703_255703Supplementary_Fig_1.pdf [file supp_pp.114.255703_255703Supplementary_Fig_1.pdf]

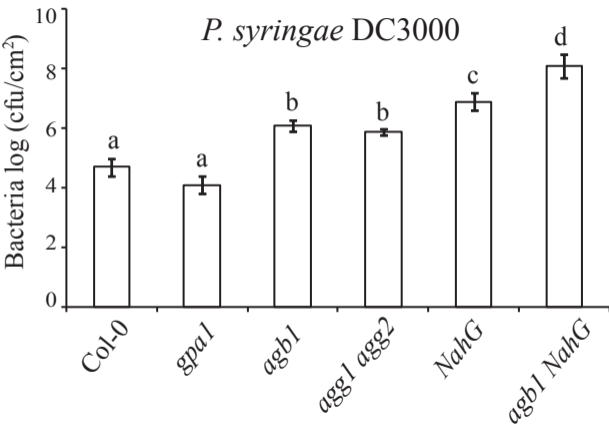

**Supplemental Figure 1.** Evaluation of the *Pst* DC3000 disease severity using independent pathways mediated by G $\beta$  $\gamma$  and salicylic acid. 5-week-old plants were spray-infected (OD600 = 0.5). Bacterial titer was estimated at 3 dpi. Letters above error bars represent statistically significant groups with difference in colony forming units ( $P < 0.001$ ).
