# Supplementary material
Source: PubMed Central journal article supplement (PMC4348786)
Supplement: supp_pp.114.255703_255703Supplementary_Fig_2.pdf [file supp_pp.114.255703_255703Supplementary_Fig_2.pdf]

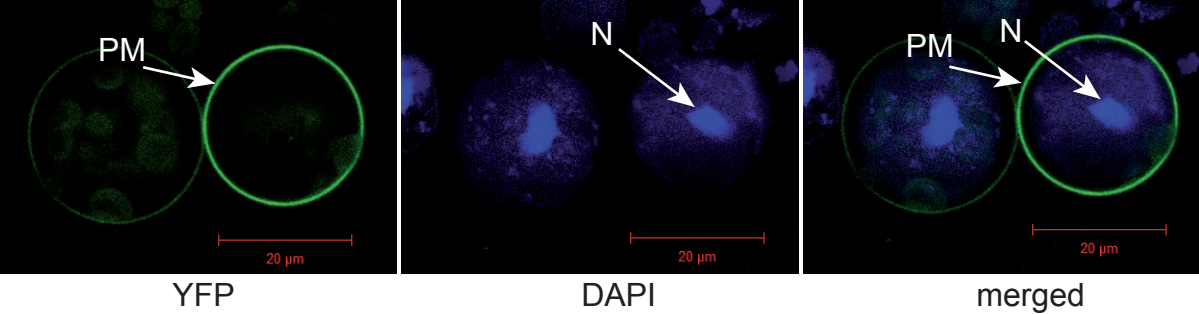

Supplemental Figure 2. Localization of the XLG2-AGB1 interaction in the presence of AGG2. Protoplasts expressing XLG2-cYFP, nYFP-AGB1 and AGG2 were stained with DAPI. PM - plasma membrane, N - nucleus.
