# Supplementary material
Source: PubMed Central journal article supplement (PMC4348786)
Supplement: supp_pp.114.255703_255703Supplementary_Fig_3.pdf [file supp_pp.114.255703_255703Supplementary_Fig_3.pdf]

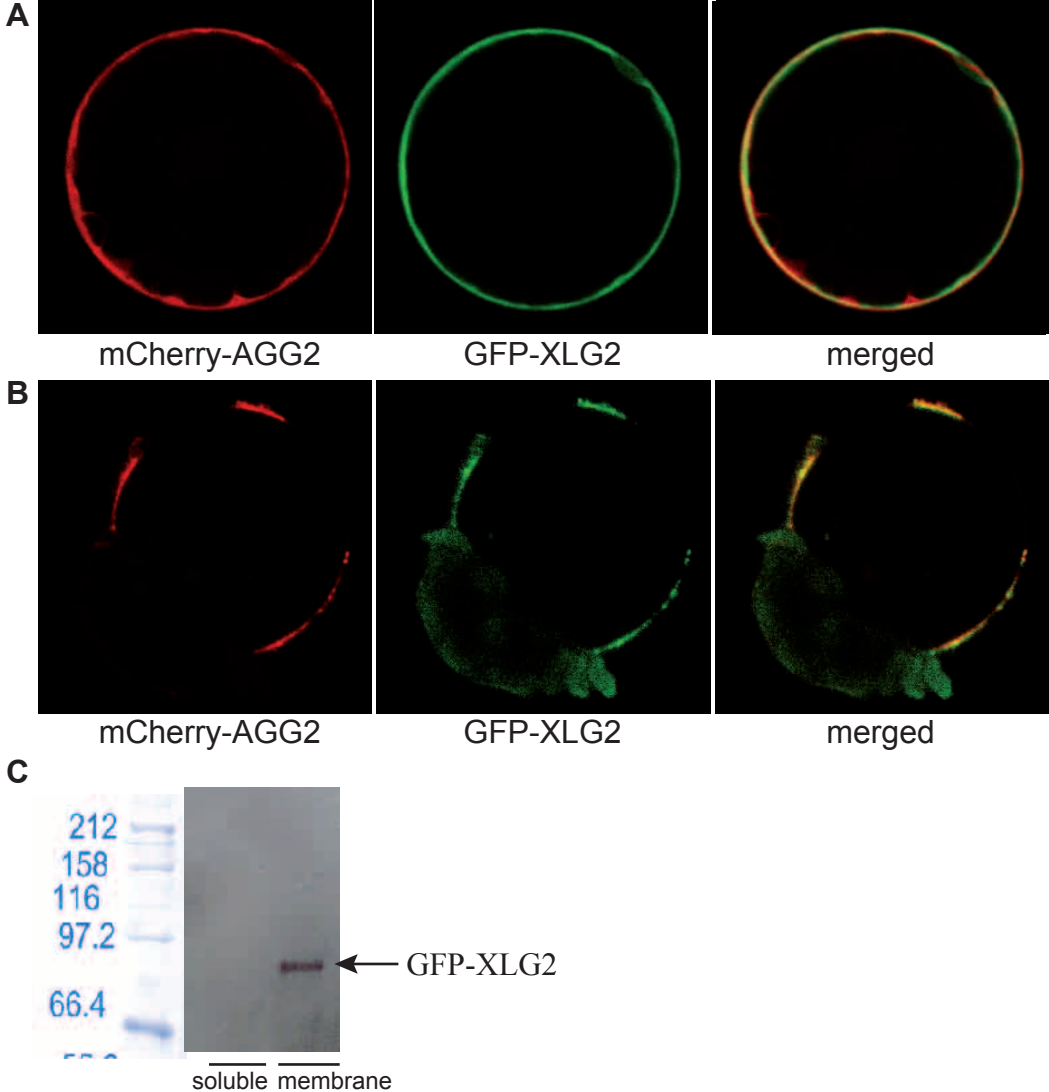

**Supplemental Figure 3.** Plasma membrane localization of GFP-XLG2.

(A) Co-localization of the XLG2 and AGG2 in mesophyll protoplast

(B) XLG2 and AGG2 retained at the plasma membrane after protoplast rupture

(C) Western blot identifies GFP-XLG2 protein in plasma membrane fraction;
